# Supplementary material for: Different Co-based MOFs templated synthesis of Co3O4nanoparticles to degrade RhB by activation of oxone
Source: Royal Society of Chemistry journal article supplement (doi:10.1039/c6ra15590a), 2016-01-01
Supplement: c6ra15590a1.pdf [file c6ra15590a1.pdf]

## **Electronic Supplementary Information (ESI)**

for

Different Co-based MOFs templated synthesis of  $\text{Co}_3\text{O}_4$   
nanoparticles to degrade RhB by activation of oxone

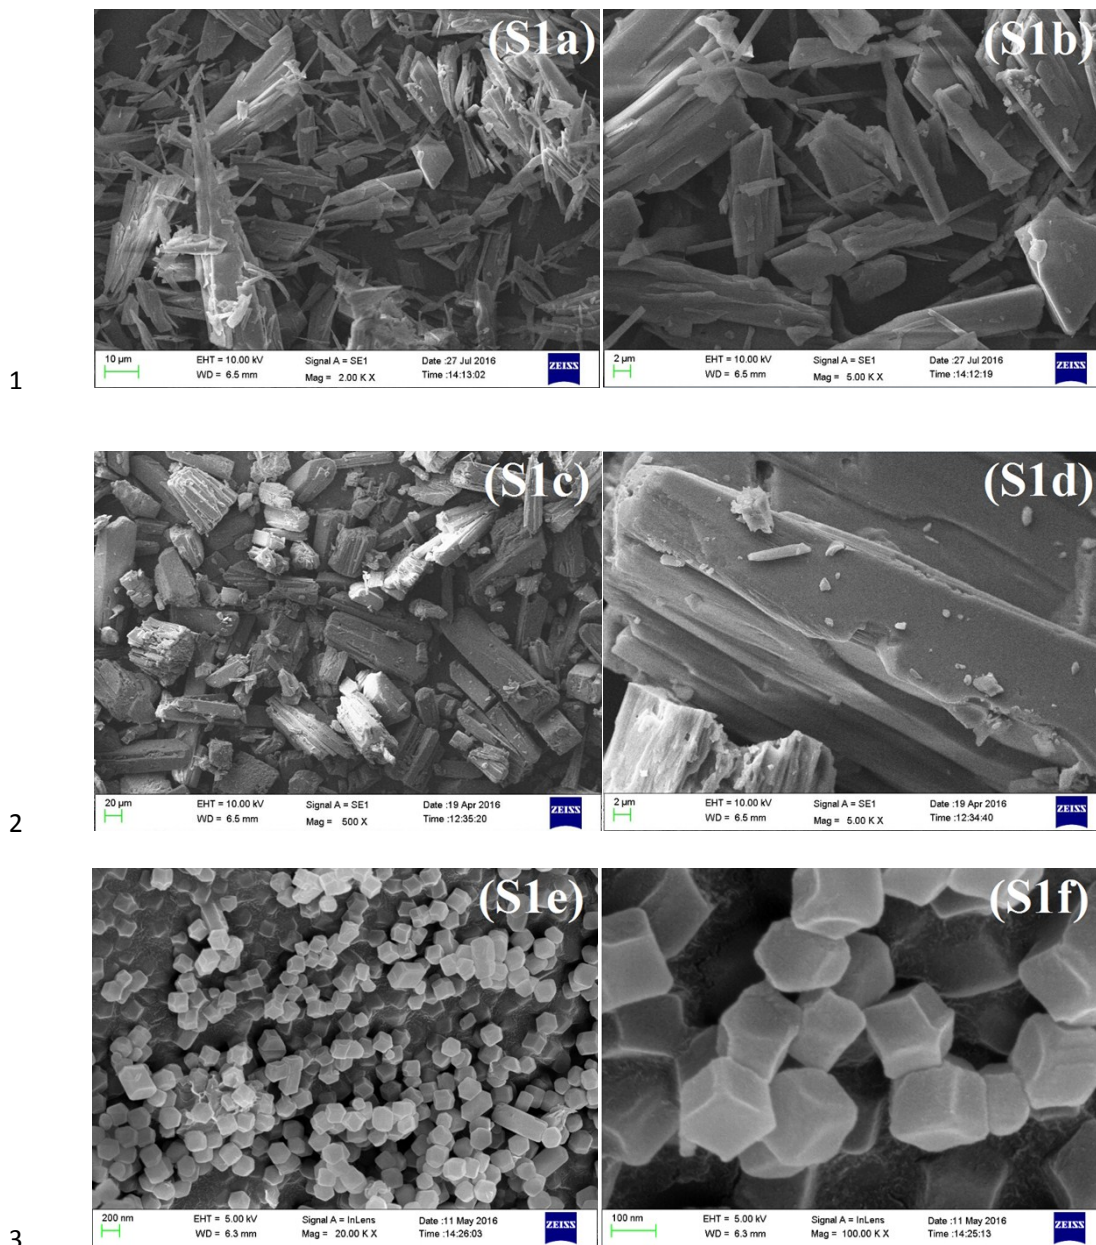

4 **Fig.S1** SEM images of Co-BDC (a, b), Co-BTC (c, d) and ZIF-67 (e, f) at  
5 different magnifications.

(a)

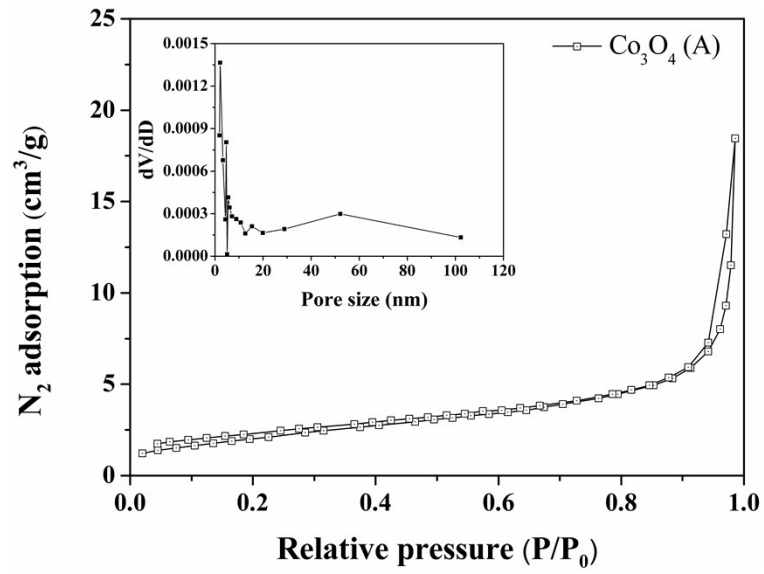

(b)

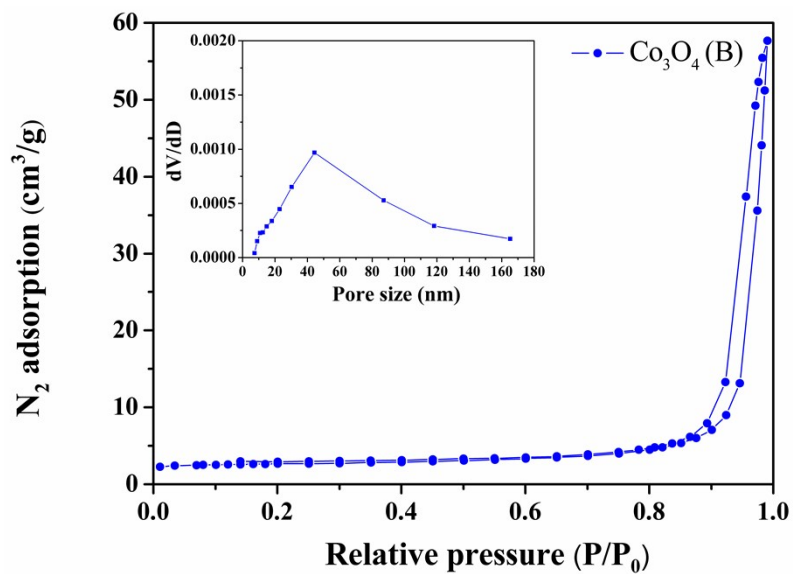

(c)

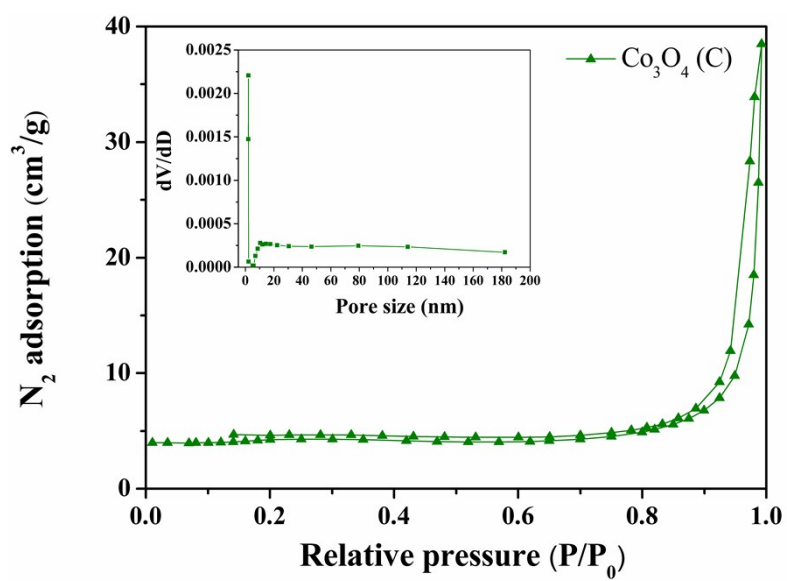

**Fig.S2**  $\text{N}_2$  adsorption-desorption isotherms and pore size distribution of  $\text{Co}_3\text{O}_4(\text{A})$  (a),  $\text{Co}_3\text{O}_4(\text{B})$  (b) and  $\text{Co}_3\text{O}_4(\text{C})$  (c).

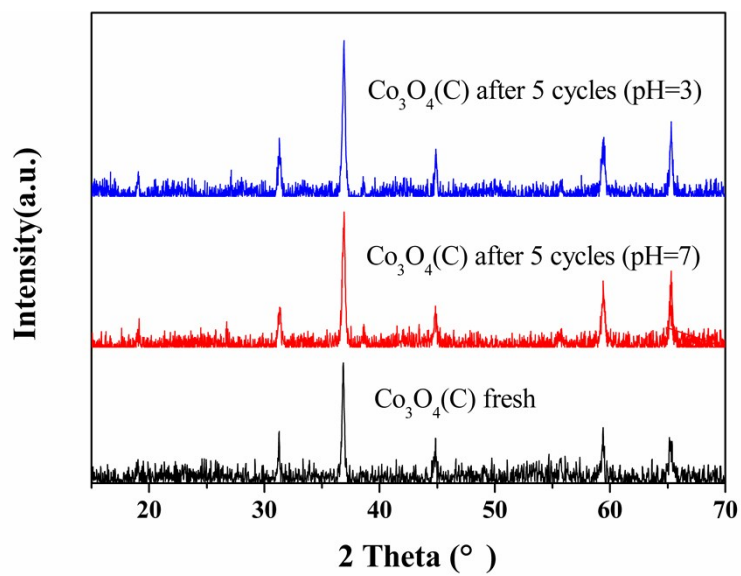

**Fig.S3** XRD patterns of the fresh  $\text{Co}_3\text{O}_4(\text{C})$  and the recovered  $\text{Co}_3\text{O}_4(\text{C})$ .
